# Supplementary material for: YAP1 plays a key role of the conversion of normal fibroblasts into cancer-associated fibroblasts that contribute to prostate cancer progression
Source: PubMed Central journal article supplement (PMC7027236; doi:10.1186/s13046-020-1542-z), 2020-02-17

Supplementary Figure S1. YAP1,  $\alpha$ -SMA and FAP are up-regulated in CAF

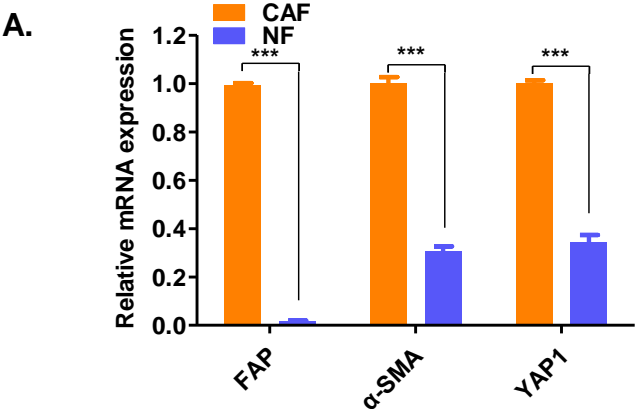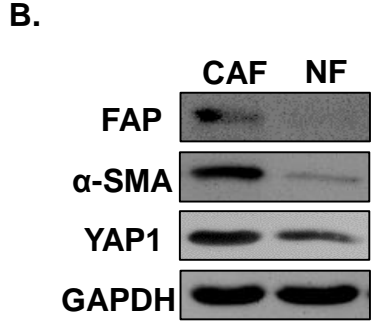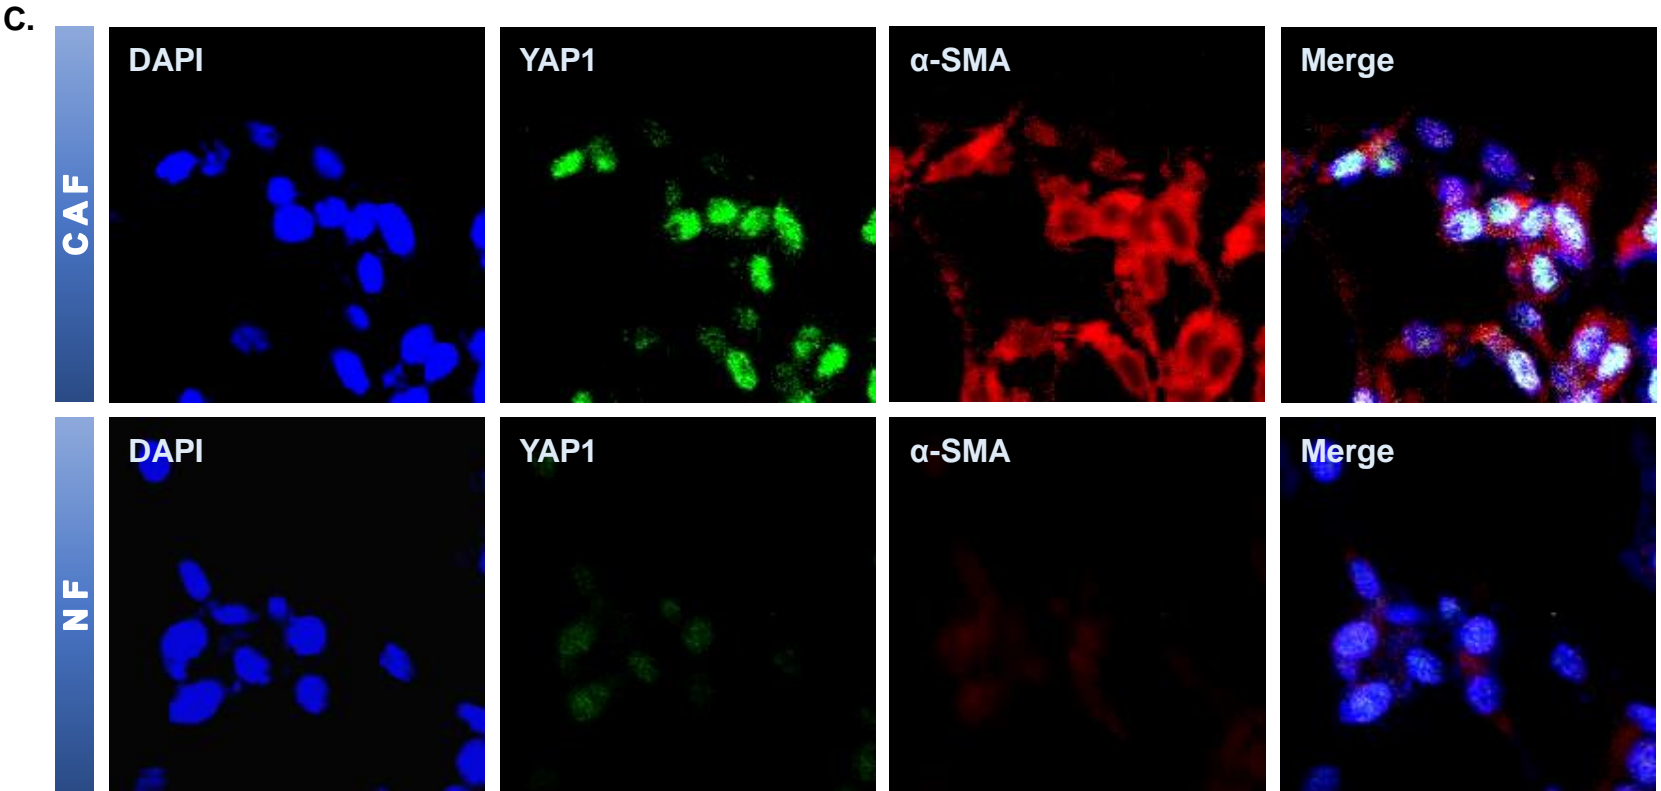

Supplement: 13046_2020_1542_MOESM1_ESM.pdf [file 13046_2020_1542_MOESM1_ESM.pdf]
