# Supplementary material for: YAP1 plays a key role of the conversion of normal fibroblasts into cancer-associated fibroblasts that contribute to prostate cancer progression
Source: Springer Nature journal article supplement (doi:10.1186/s13046-020-1542-z), 2020-02-17

# Supplementary Figure S3. SRC regulates the invasive ability of epithelial cells through CAF

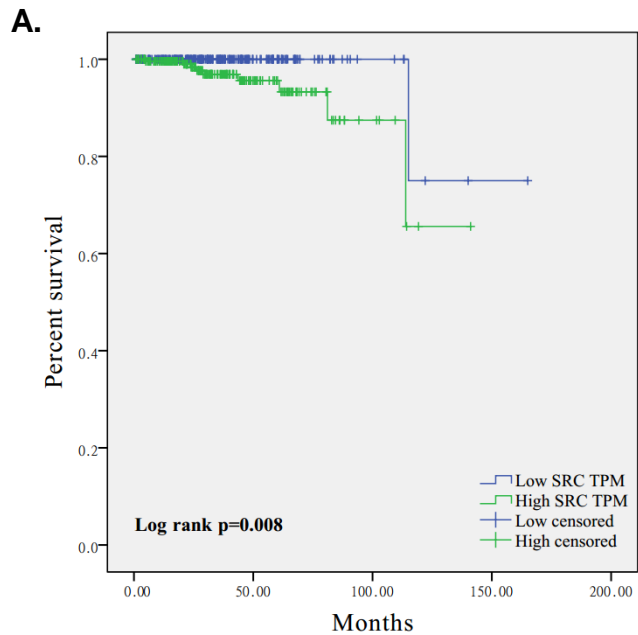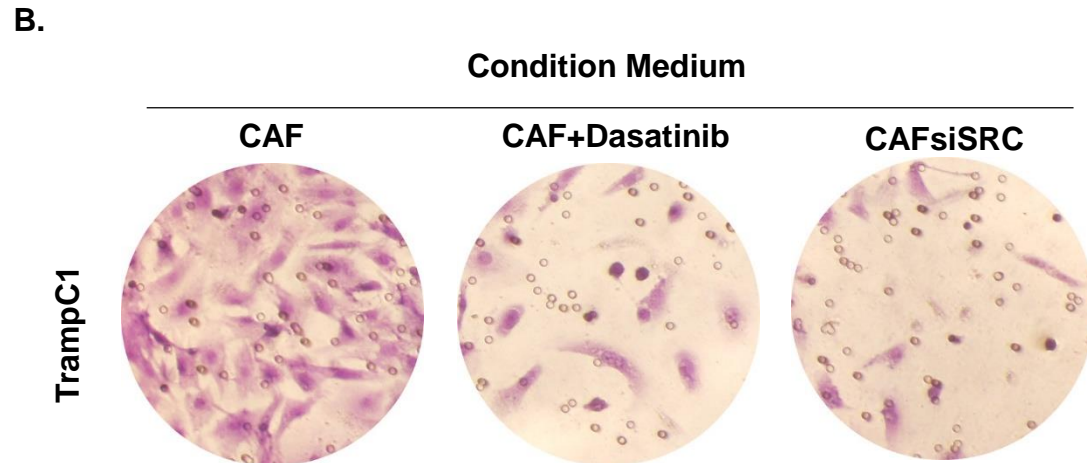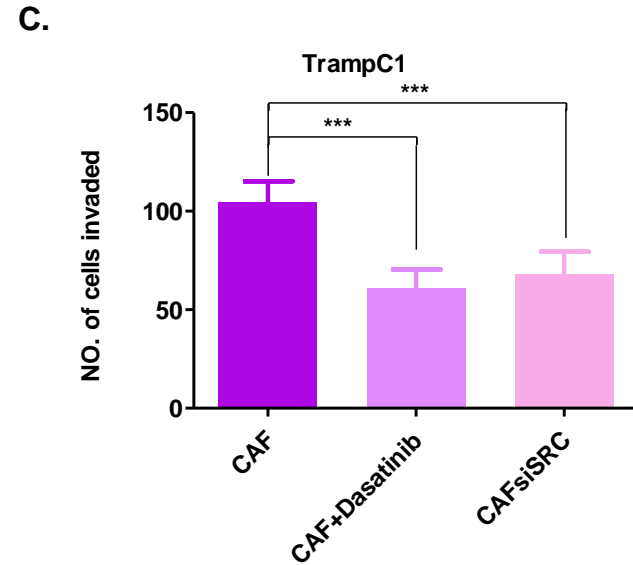

Supplement: MOESM3 [file 17715900]
